# Supplementary material for: Herbicidal ionic liquids derived from renewable sources
Source: Royal Society of Chemistry journal article supplement (doi:10.1039/c6ra06703d), 2016-01-01
Supplement: c6ra06703d1.pdf [file c6ra06703d1.pdf]

## Electronic Supplementary Information

### Herbicidal ionic liquids derived from renewable sources

Juliusz Pernak<sup>a</sup>, Kamil Czerniak<sup>a</sup>, Agnieszka Biedziak<sup>a</sup>, Katarzyna Marcinkowska<sup>b</sup>, Tadeusz Praczyk<sup>b</sup>, Karol Erfurt<sup>c</sup>, Anna Chrobok<sup>c</sup>

<sup>a</sup>Department of Chemical Technology, Poznan University of Technology, 60-965 Poznan, Poland

<sup>b</sup>Institute of Plant Protection - National Research Institute, 60-318 Poznan, Poland

<sup>c</sup>Department of Chemical Organic Technology and Petrochemistry, Silesian University of Technology, 44-100 Gliwice, Poland

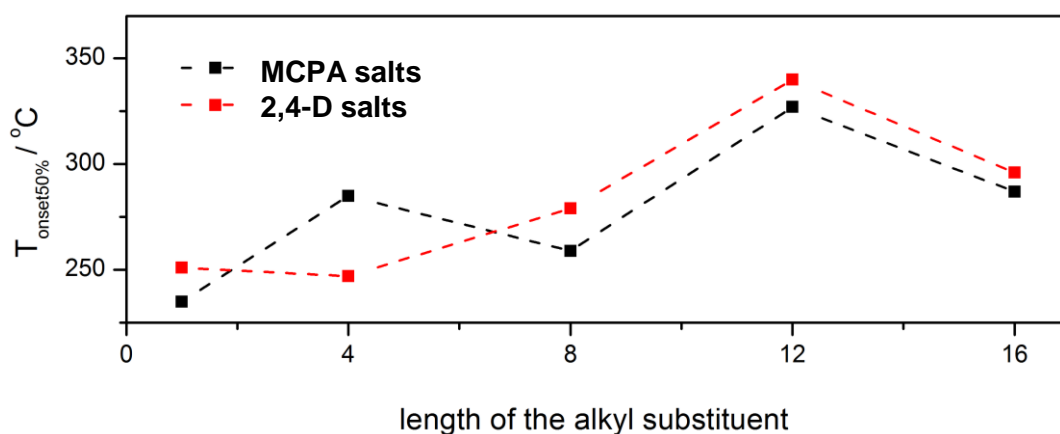

**Figure S1.** Changes in the decomposition temperatures ( $T_{\text{onset}50\%}$ ) determined for salts derived from the MCPA and 2,4-D anion as an effect of increasing the chain length of the alkyl substituent.

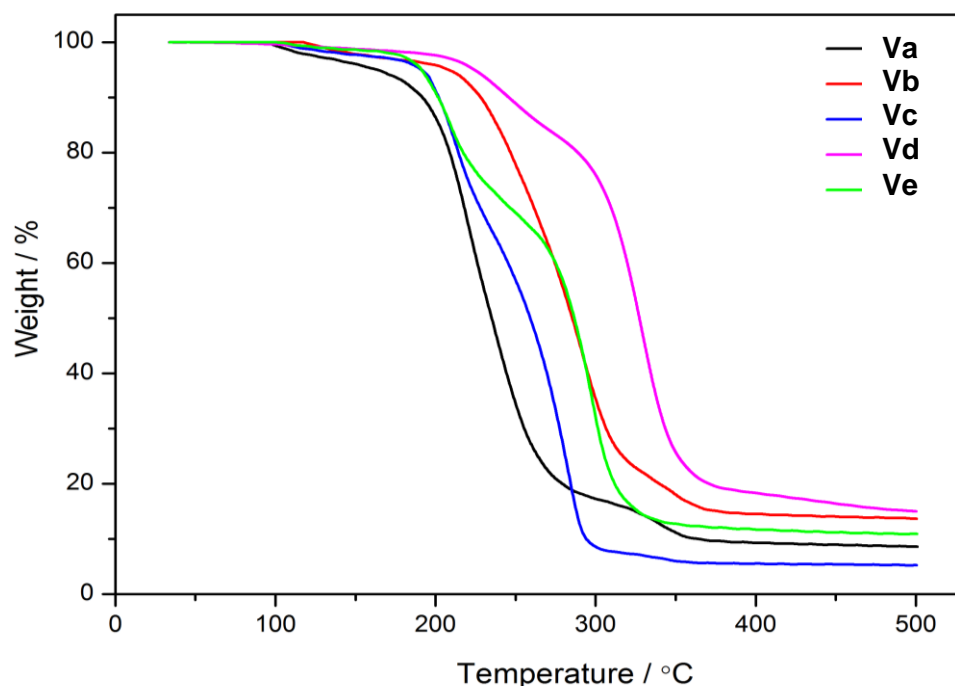

**Figure S2.** TGA curves of the obtained MCPA-based ILs

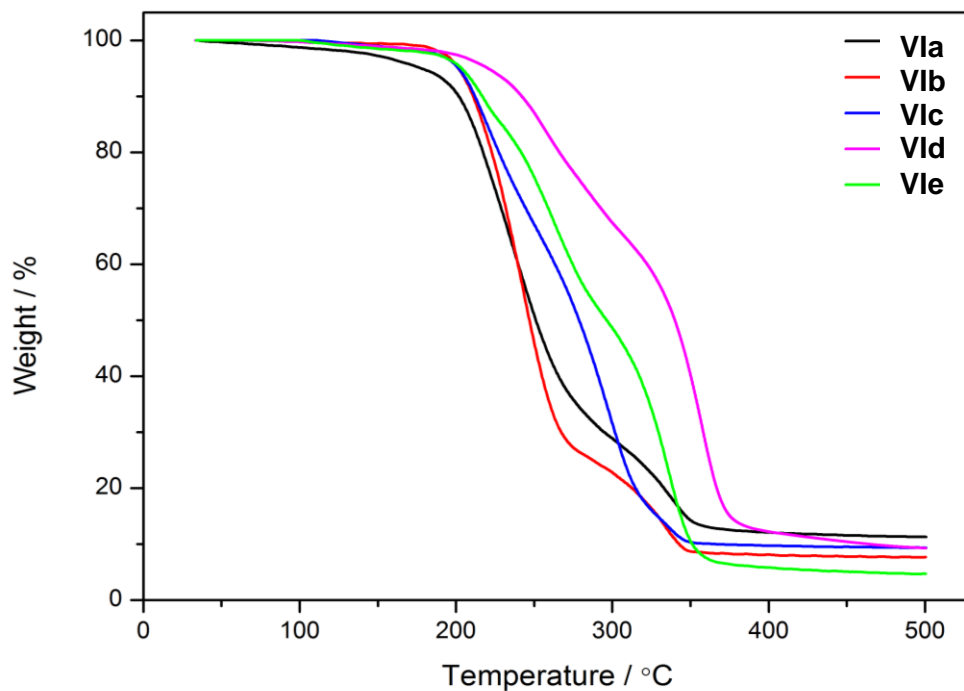

**Figure S3.** TGA curves of the obtained 2,4-D-based salts

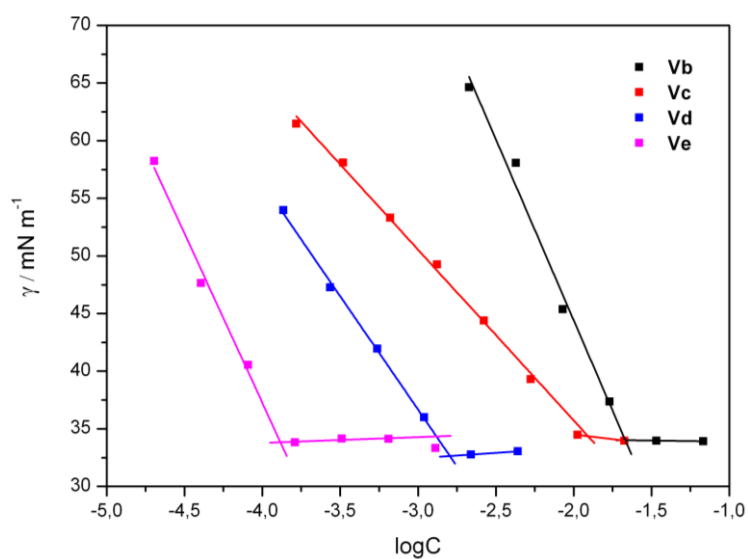

**Figure S4.** Surface tension ( $\gamma$ ) as a function of logarithm of concentration for ILs V

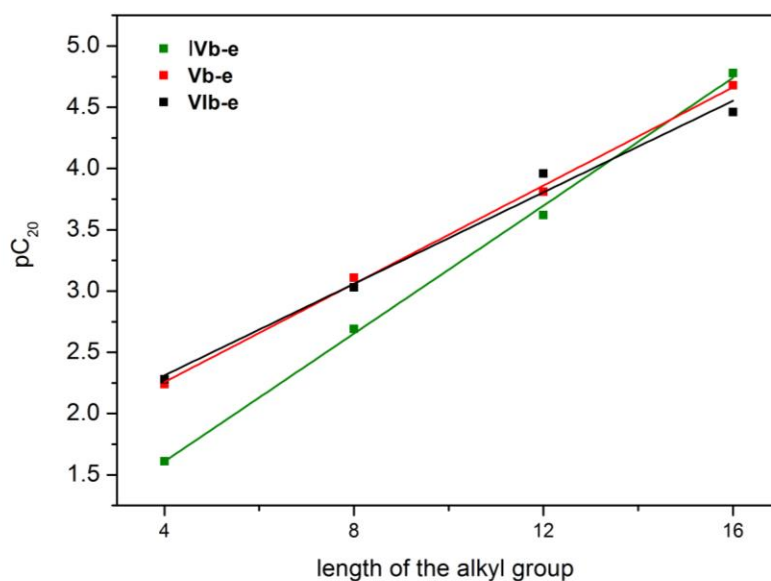

**Figure S5** Relationship between  $pC_{20}$  and the number of carbon atoms in the alkyl substituent of bromides (**IVb-e**), salts with the MCPA anion (**Vb-e**) and the 2,4D anion (**VIb-e**).

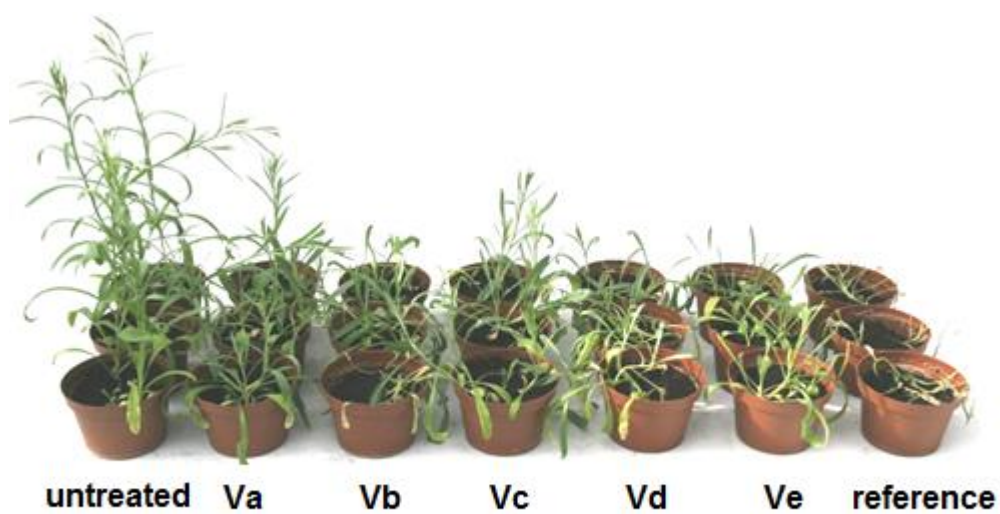

**Figure S6.** The efficacy of ILs **V** against cornflower.

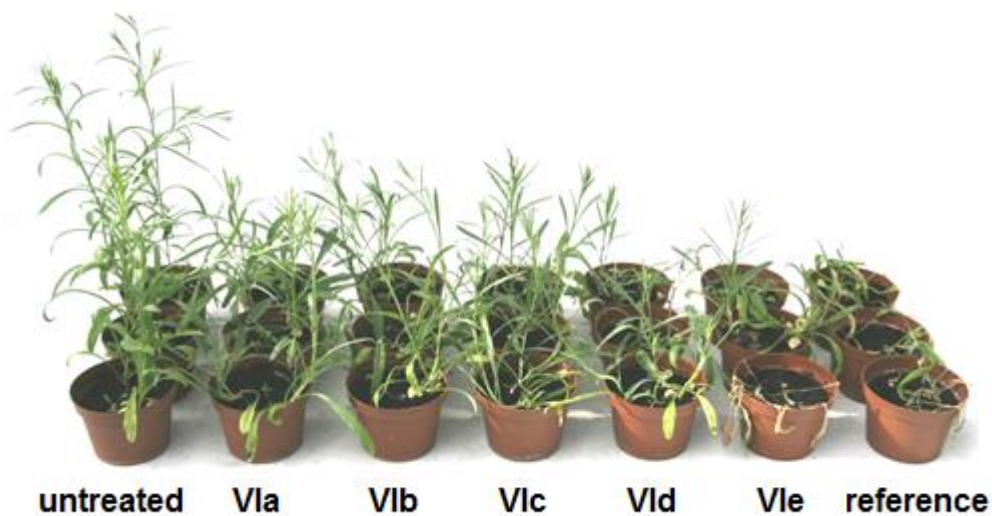

**Figure S7.** The efficacy of salts **VI** against cornflower.

**Table S1.** The influence of ILs **V** on weed control.

| Treatment        | Fresh weight reduction (%) |                |               |    |
|------------------|----------------------------|----------------|---------------|----|
|                  | Cornflower                 |                | White mustard |    |
| <b>Va</b>        | 40                         | c <sup>a</sup> | 54            | b  |
| <b>Vb</b>        | 69                         | ab             | 77            | ab |
| <b>Vc</b>        | 39                         | c              | 75            | ab |
| <b>Vd</b>        | 57                         | bc             | 87            | a  |
| <b>Ve</b>        | 56                         | bc             | 76            | ab |
| MCPA (reference) | 86                         | a              | 75            | ab |

<sup>a</sup>The same letter in the column indicates no statistical differences between treatments.

**Table S2.** The influence of salts **VI** on weed control.

| Treatment         | Fresh weight reduction (%) |    |               |    |
|-------------------|----------------------------|----|---------------|----|
|                   | Cornflower                 |    | White mustard |    |
| <b>VIa</b>        | 23                         | ba | 39            | b  |
| <b>VIb</b>        | 30                         | ab | 39            | b  |
| <b>VIc</b>        | 34                         | ab | 52            | ab |
| <b>VIe</b>        | 34                         | ab | 64            | ab |
| <b>VIe</b>        | 66                         | ab | 71            | a  |
| 2,4-D (reference) | 67                         | a  | 74            | a  |

<sup>a</sup> The same letter in the column indicates no statistical differences between treatments.
